# Supplementary material for: Tuning the properties of tris(hydroxypyridinone) ligands: efficient 68Ga chelators for PET imaging
Source: PubMed Central journal article supplement (PMC6469224; doi:10.1039/c8dt04454f), 2019-03-12
Supplement: DT-048-C8DT04454F-s001.pdf [file DT-048-C8DT04454F-s001.pdf]

## Electronic Supplementary Information

### Tuning the properties of *tris*(hydroxypyridinone) ligands: efficient $^{68}\text{Ga}$ chelators for PET imaging

#### Content

S.1 THP<sup>Me</sup> radiolabelling

S.2 THP<sup>Me</sup> *in vivo* radiolabelling experiment

Table S1-S2 Measured complex formation constants for THP<sup>Me</sup> and THP<sup>H</sup>

Figure S1 Chemical structures of selected Ga<sup>3+</sup> chelators evaluated for use with  $^{68}\text{Ga}$ .

Figure S2, S3 HPLC characterisation of THP<sup>H</sup> and THPO (additional UV chromatograms)

Figure S4 [<sup>nat</sup>Ga(THP<sup>H</sup>)] mass spectrum

Figure S5 Absorbance spectra of THP ligands

Figure S6 <sup>1</sup>H NMR spectrum of an equimolar mixture of THP<sup>H</sup> and THP<sup>Me</sup>

Figure S7 Serum stability of [<sup>67</sup>Ga(THP<sup>H</sup>)]

Figure S8 *In vivo* behaviour of THP<sup>Me</sup>

Figure S9-S16 <sup>1</sup>H NMR and <sup>13</sup>C NMR of compounds 2-9

## S.1 THP<sup>Me</sup> radiolabelling

An E&Z generator was eluted with 5 mL of pure HCl 0.1 M (Fluka analytical) in five 1 mL fractions and their activity measured by a Capintec radionuclide dose calibrator. An aliquot of the highest activity fraction (100  $\mu$ L, 15-20 MBq) was mixed with THP<sup>Me</sup> (100  $\mu$ L, concentration range 200-2  $\mu$ M) in ammonium acetate 0.5 M. Verification of the radiolabelling was carried out after 5 minutes by reversed-phase HPLC (method 7: Mobile phase A: H<sub>2</sub>O + 0.1% TFA, B: MeCN + 0.1% TFA, % B increased from 2% at 5 minutes to 90% at 25 minutes and back to 2% at 27 minutes) and iTLC-SG (mobile phase 1:  $R_f$  [Ga(THP<sup>Me</sup>)] = 0,  $R_f$  Ga<sub>colloid</sub> = 0,  $R_f$  <sup>68</sup>Ga<sub>free</sub> = 1; mobile phase 2:  $R_f$  [Ga(THP<sup>Me</sup>)] = 1,  $R_f$  <sup>68</sup>Ga<sub>free</sub> = 0, <sup>68</sup>Ga<sub>colloid</sub> = 0). Quantitative radiolabelling was obtained for all examined concentrations. A single peak was obtained in the radiochromatogram at 15 min 28 s (**Figure S8B**, upper panel). Radiolabelling of THP<sup>Me</sup> at 0.1  $\mu$ M was performed using a second E&Z generator, eluted with clinical grade 0.1 M HCl (E&Z).

## S.2 THP<sup>Me</sup> *in vivo* radiolabelling experiment

A female BALB/c mouse (22 g, 9 weeks, Charles Rivers) was anaesthetised with isoflurane (O<sub>2</sub> flow rate of 1.0-1.5 L/min and isoflurane levels of 2-2.5%), cannulated using a catheter (25  $\mu$ L volume) and subjected to a CT scan. Subsequently, a PET scan was started, and the mouse injected with acetate buffered <sup>68</sup>Ga (150  $\mu$ L, 0.1 M ammonium acetate, 8.12 MBq) while scanning, followed at 45 minutes by an injection of THP<sup>Me</sup> (100  $\mu$ L of a 24  $\mu$ M solution in PBS). Upon completion of the scans, the animal was sacrificed by neck dislocation whilst anaesthetised and the urine was collected and analysed by reversed-phase HPLC (method 7). Similar to what was observed for THP<sup>H</sup>, THP<sup>Me</sup> was able to bind <sup>68</sup>Ga *in vivo* thus accelerating its blood clearance (**Figure S8A**), and HPLC analysis of mouse urine (**Figure S8B**) revealed quantitative formation of the [<sup>68</sup>Ga(THP<sup>Me</sup>)] complex. These data confirm previous *in vitro* studies demonstrating the ability of THP<sup>Me</sup> to transchelate transferrin-bound Ga(III).<sup>1</sup>

**Table S1.** Formation constants for the Ga(III) and Fe(III) complexes of deferiprone. Detailed species and chemical equations for which the complex formation constants were determined are defined below. Speciation plots for  $[L]_{total} = 10 \mu\text{M}$  and  $[M]_{total} = 1 \mu\text{M}$  are also reported.

| <b>Deferiprone</b>                                                                       |                                                                                      |
|------------------------------------------------------------------------------------------|--------------------------------------------------------------------------------------|
| $L = $ 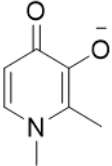 |                                                                                      |
| <b>Chemical equilibrium equations</b>                                                    |                                                                                      |
| $M^{3+} + L^{-} \rightleftharpoons [ML]^{2+}$                                            | $Log \beta_{[ML]^{2+}}$                                                              |
| $M^{3+} + 2 L^{-} \rightleftharpoons [ML_2]^{+}$                                         | $Log \beta_{[ML_2]^{+}}$                                                             |
| $M^{3+} + 3 L^{-} \rightleftharpoons [ML_3]$                                             | $Log \beta_{[ML_3]}$                                                                 |
| $M^{3+} + 4 OH^{-} \rightleftharpoons [M(OH)_4]^{-}$                                     | $Log \beta_{[M(OH)_4]^{-}}$                                                          |
| <b>Complex formation constants</b>                                                       |                                                                                      |
| $Log \beta_{[FeL]^{2+}}$                                                                 | 15.0 *                                                                               |
| $Log \beta_{[FeL_2]^{+}}$                                                                | 27.5 *                                                                               |
| $Log \beta_{[FeL_3]}$                                                                    | 37.5 *                                                                               |
| $Log \beta_{[Fe(OH)_4]^{-}}$                                                             | 34.4 <sup>2</sup>                                                                    |
| pFe                                                                                      | 20.8                                                                                 |
| $Log \beta_{[GaL]^{2+}}$                                                                 | 14.4 *                                                                               |
| $Log \beta_{[GaL_2]^{+}}$                                                                | 27.0*                                                                                |
| $Log \beta_{[GaL_3]}$                                                                    | 37.4 *                                                                               |
| $Log \beta_{[Ga(OH)_4]^{-}}$                                                             | 39.4 <sup>2</sup>                                                                    |
| pGa                                                                                      | 20.7                                                                                 |
| <b>Speciation plots</b>                                                                  |                                                                                      |
|       |  |

\* Stability constants for deferiprone have been previously reported in the literature;<sup>3</sup> measurements have been repeated here as a control to verify the accuracy of our titration methods.

**Table S2.** Conditional formation constants for the Ga(III) and Fe(III) complexes of THP<sup>Me</sup>. Detailed species and chemical equations for which the constants were determined are defined below. Speciation plots for  $[L]_{total} = 10 \mu M$  and  $[M]_{total} = 1 \mu M$  are also reported.

| <b>THP<sup>Me</sup></b>                                                                                         |                                                                                                                |
|-----------------------------------------------------------------------------------------------------------------|----------------------------------------------------------------------------------------------------------------|
| 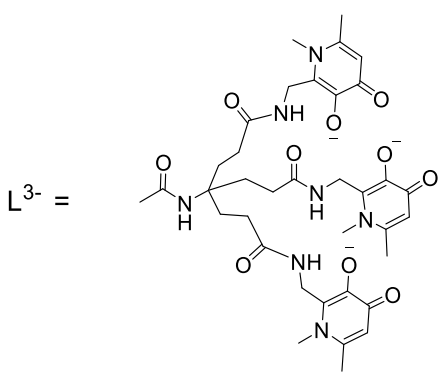 <p><math>L^{3-} =</math></p> |                                                                                                                |
| <b>Chemical equilibrium equations</b>                                                                           |                                                                                                                |
| $M^{3+} + L^{3-} \rightleftharpoons [ML]$ $M^{3+} + 4 OH^- \rightleftharpoons [M(OH)_4]^-$                      | $\text{Log } \beta_{[ML]}$ $\text{Log } \beta_{[M(OH)_4]}^-$                                                   |
| <b>Conditional formation constants</b>                                                                          |                                                                                                                |
| $\text{Log } \beta_{[FeL]} \quad 34.2$ $\text{Log } \beta_{[Fe(OH)_4]}^- \quad 34.4^2$ $\text{pFe} \quad 29.1$  | $\text{Log } \beta_{[GaL]} \quad 35.0$ $\text{Log } \beta_{[Ga(OH)_4]}^- \quad 39.4^2$ $\text{pGa} \quad 30.0$ |
| <b>Speciation plots</b>                                                                                         |                                                                                                                |
|                              |                            |

**Table S3.** Conditional formation constants for the Ga(III) and Fe(III) complexes of THP<sup>H</sup>. Detailed species and chemical equations for which the constants were determined are defined below. Speciation plots are also reported for [L]<sub>total</sub> = 10 μM and [M]<sub>total</sub> = 1 μM (gallium complex) and [L]<sub>total</sub> = 20 μM, [M]<sub>total</sub> = 20 μM and [EDTA]<sub>total</sub> = 50 mM (iron complex).

| <b>THP<sup>H</sup></b>                                                              |                                           |                                                                                      |                   |
|-------------------------------------------------------------------------------------|-------------------------------------------|--------------------------------------------------------------------------------------|-------------------|
| 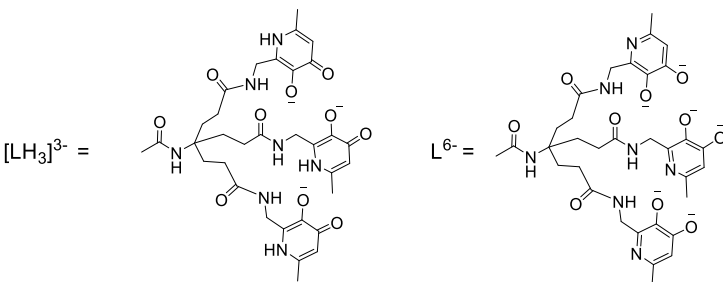  |                                           |                                                                                      |                   |
| <b>Chemical equilibrium equations</b>                                               |                                           |                                                                                      |                   |
| $M^{3+} + L^{6-} + 3 H^+ \rightleftharpoons [MLH_3]$                                | $\text{Log } \beta_{[MLH_3]}^*$           |                                                                                      |                   |
| $M^{3+} + L^{6-} \rightleftharpoons [ML]^{3-}$                                      | $\text{Log } \beta_{[ML]^{3-}}$           |                                                                                      |                   |
| $M^{3+} + 4 OH^- \rightleftharpoons [M(OH)_4]^-$                                    | $\text{Log } \beta_{[M(OH)_4]^-}$         |                                                                                      |                   |
| $Fe^{3+} + EDTA^{4-} + 2 OH^- \rightleftharpoons [FeEDTA(OH)_2]^{3-}$               | $\text{Log } \beta_{[FeEDTA(OH)_2]^{3-}}$ |                                                                                      |                   |
| <b>Conditional formation constants</b>                                              |                                           |                                                                                      |                   |
| $\text{Log } \beta_{[FeLH_3]}$                                                      | 72.9*                                     | $\text{Log } \beta_{[GaLH_3]}$                                                       | 76.2*             |
| $\text{Log } \beta_{[FeL]^{3-}}$                                                    | 40.9                                      | $\text{Log } \beta_{[GaL]^{3-}}$                                                     | 42.5              |
| $\text{Log } \beta_{[Fe(OH)_4]^-}$                                                  | 34.4 <sup>2</sup>                         | $\text{Log } \beta_{[Ga(OH)_4]^-}$                                                   | 39.4 <sup>2</sup> |
| $\text{Log } \beta_{[FeEDTA(OH)_2]^{3-}}$                                           | 42.0 <sup>2</sup>                         | pGa                                                                                  | 31.8              |
| pFe                                                                                 | 28.6                                      |                                                                                      |                   |
| <b>Speciation plots</b>                                                             |                                           |                                                                                      |                   |
|  |                                           |  |                   |

\* Because only intrinsic metal complex protonation<sup>4</sup> can be discriminated using this method, the cumulative 3 protons metal complex formation constant was fitted with the data with no further stepwise constant fitting.

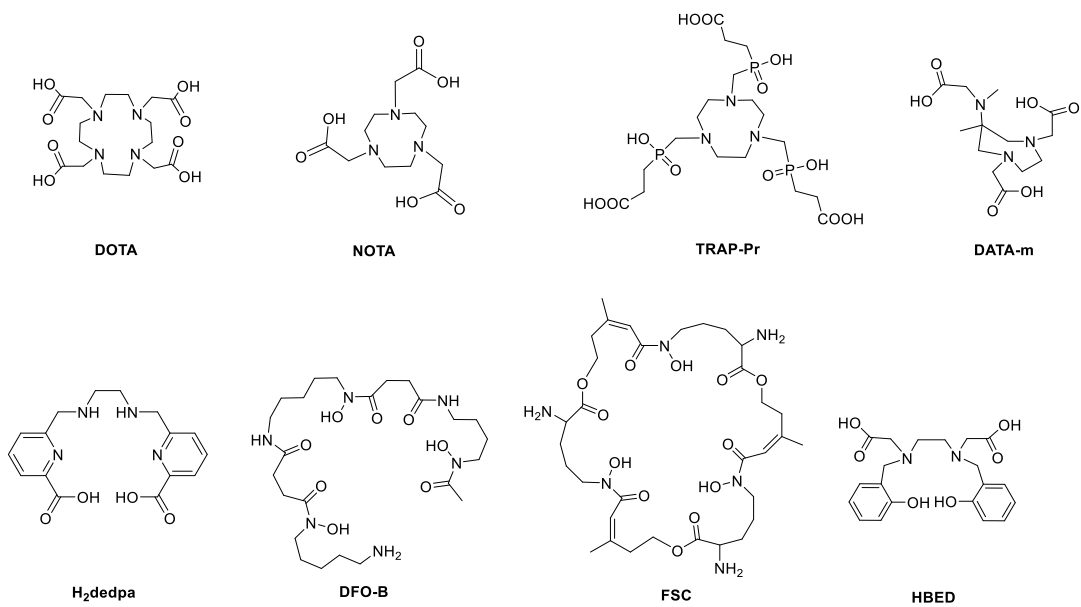

**Figure S1.** Chemical structures of selected  $Ga^{3+}$  chelators evaluated for use with  $^{68}Ga$ .

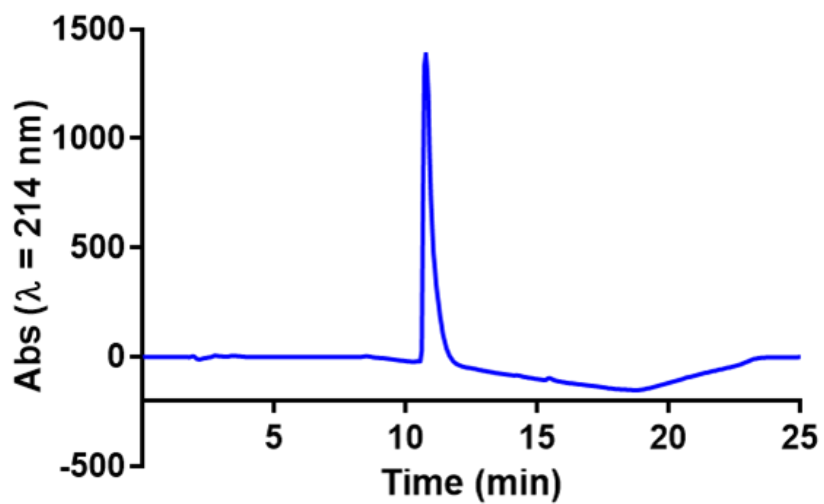

*Figure S2. UV Chromatogram ( $\lambda = 214$  nm) of THP<sup>H</sup> using HPLC method 5.*

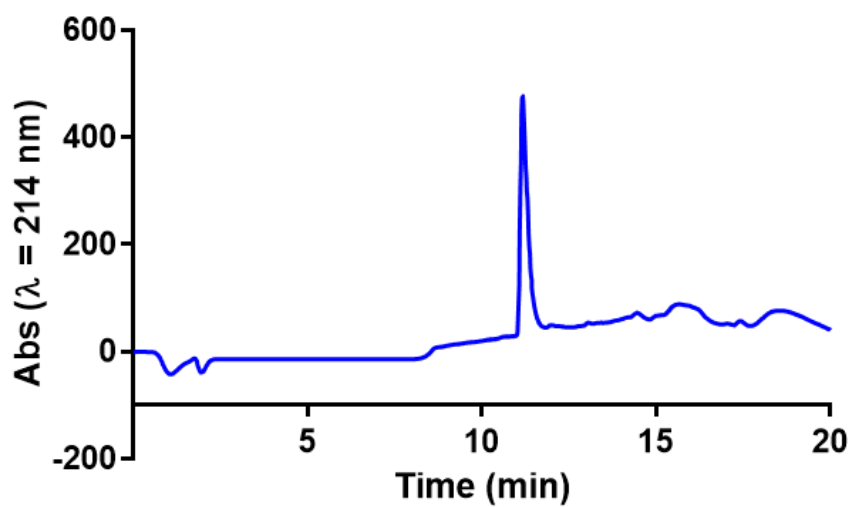

*Figure S3. UV Chromatogram ( $\lambda = 214$  nm) of THPO using HPLC method 6.*

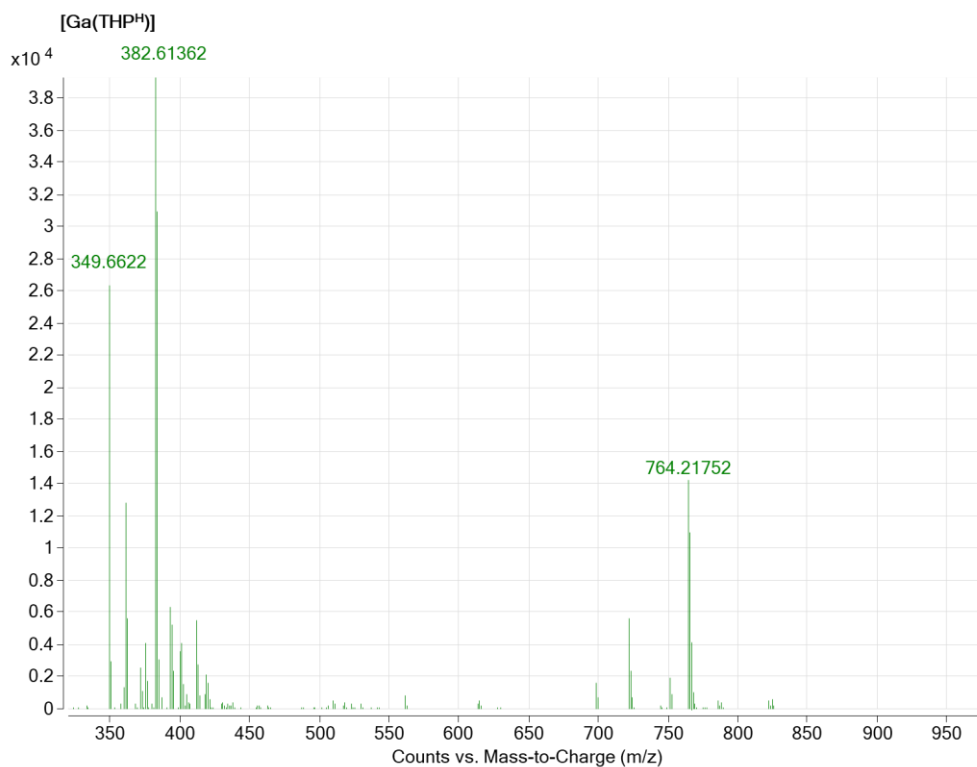

**Figure S4.** ESI mass spectrum for the  $[Ga(THP^H)]$  complex. The peak at 764.22 m/z represents  $[Ga(THP^H)+H]^+$  and shows the typical isotopic pattern of a natural gallium complex. Peak at 382.61 and 349.67 are assigned to the doubly-charged species  $[Ga(THP^H)+2H]^{2+}$  and  $[THP^H+2H]^{2+}$ , respectively. The minor peak at 698.32 represents  $[THP^H+H]^+$ , peaks at 720.29 and 751.23 m/z are assigned to the sodium and iron complex of  $THP^H$ , respectively. No peaks assignable to stoichiometry other than 1:1 were visible.



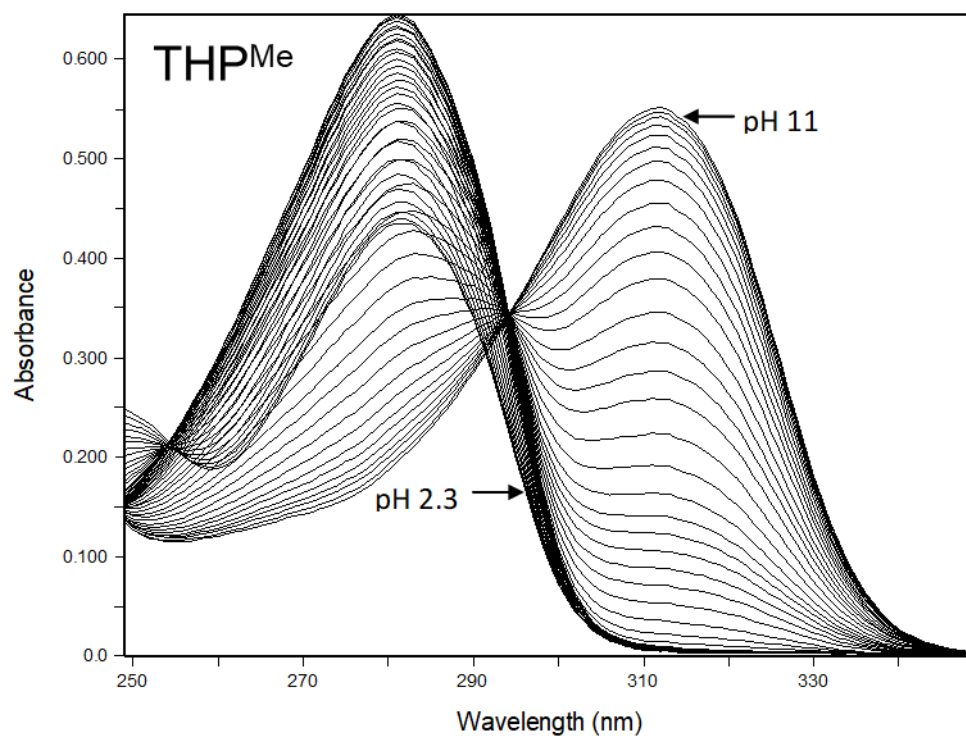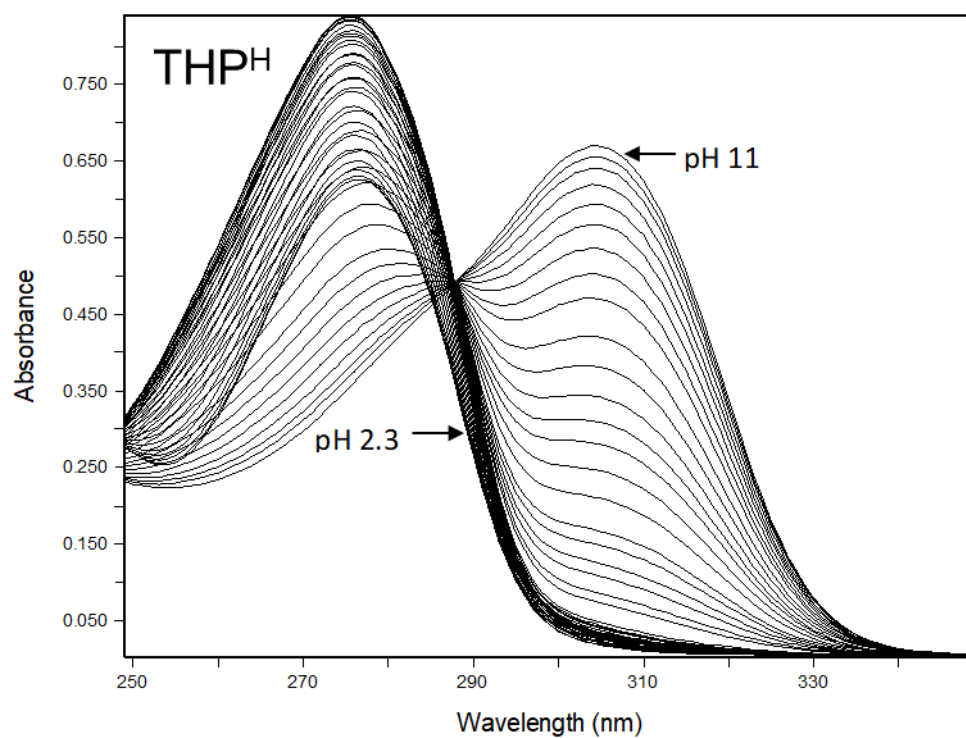

**Figure S5.** Absorbance spectra of THP<sup>Me</sup> and THP<sup>H</sup> ( $\lambda_{range} = 250-400$  nm) at different pH values (intervals of 0.1 pH unit).

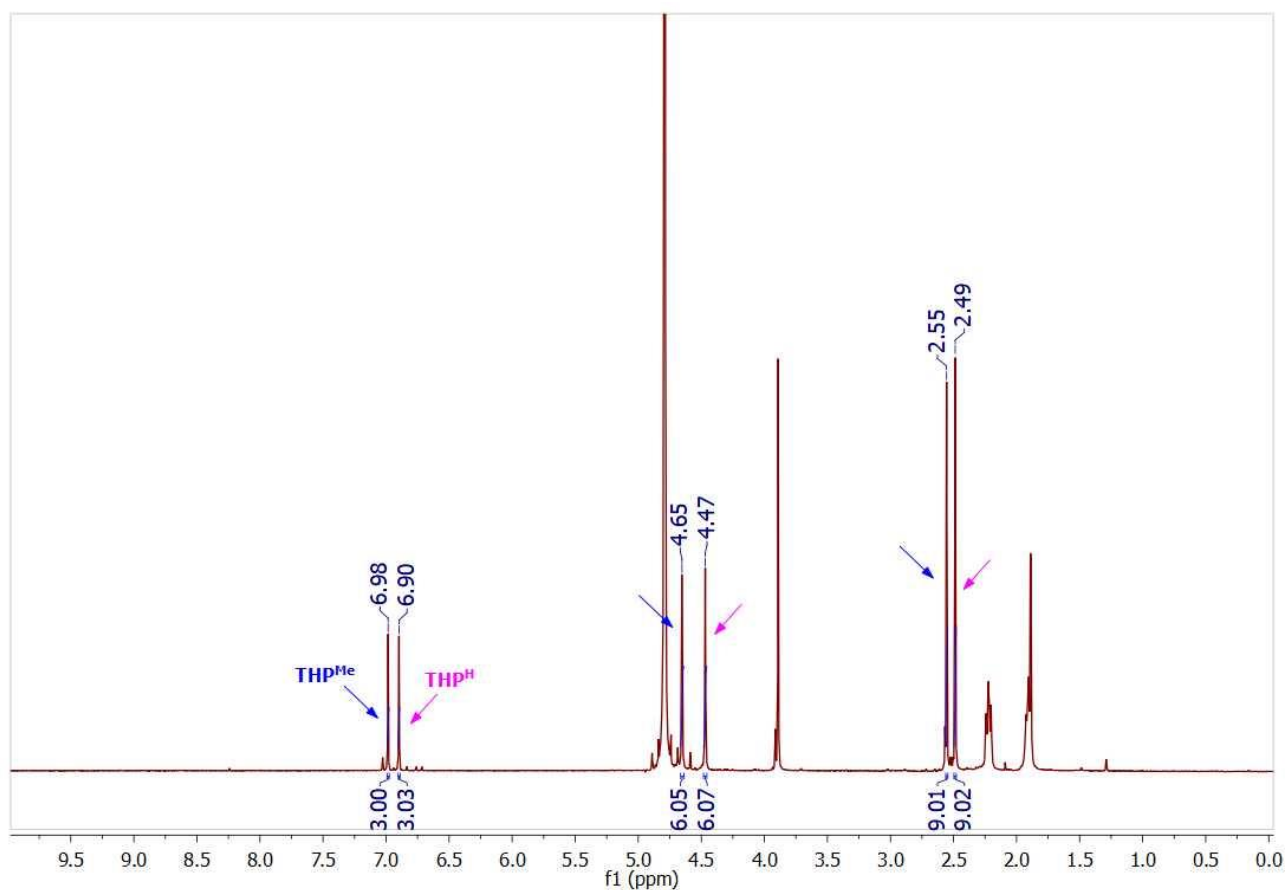

**Figure S6.**  $^1\text{H}$  NMR of a solution 2 mM in THP<sup>Me</sup> and 2 mM in THP<sup>H</sup> in D<sub>2</sub>O. Peaks are referenced to residual solvent signal. Pink and blue arrows indicate signals from THP<sup>H</sup> and THP<sup>Me</sup>, respectively. Peak integration is reported (from left to right) for the pyridinone C<sup>5</sup>-H hydrogen, the C<sup>2</sup>-CH<sub>2</sub>-NH<sub>2</sub> group and the C<sup>6</sup>-CH<sub>3</sub>, confirming equal concentration of the two ligands.

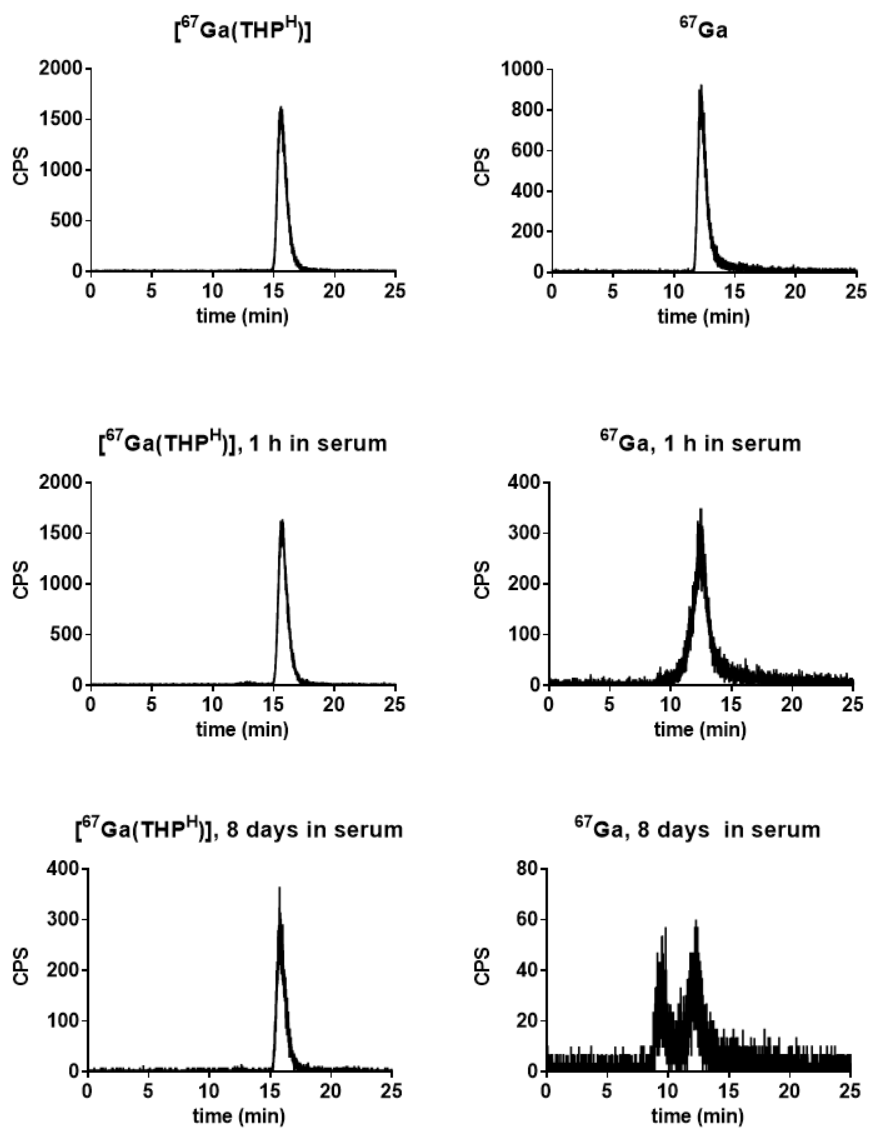

**Figure S7.** Size-exclusion radiochromatograms of  $[^{67}\text{Ga}(\text{THP}^{\text{H}})]$  and  $^{67}\text{Ga}$  without human serum and after incubation with human serum at 37 °C at 1 hour and up to 8 days.

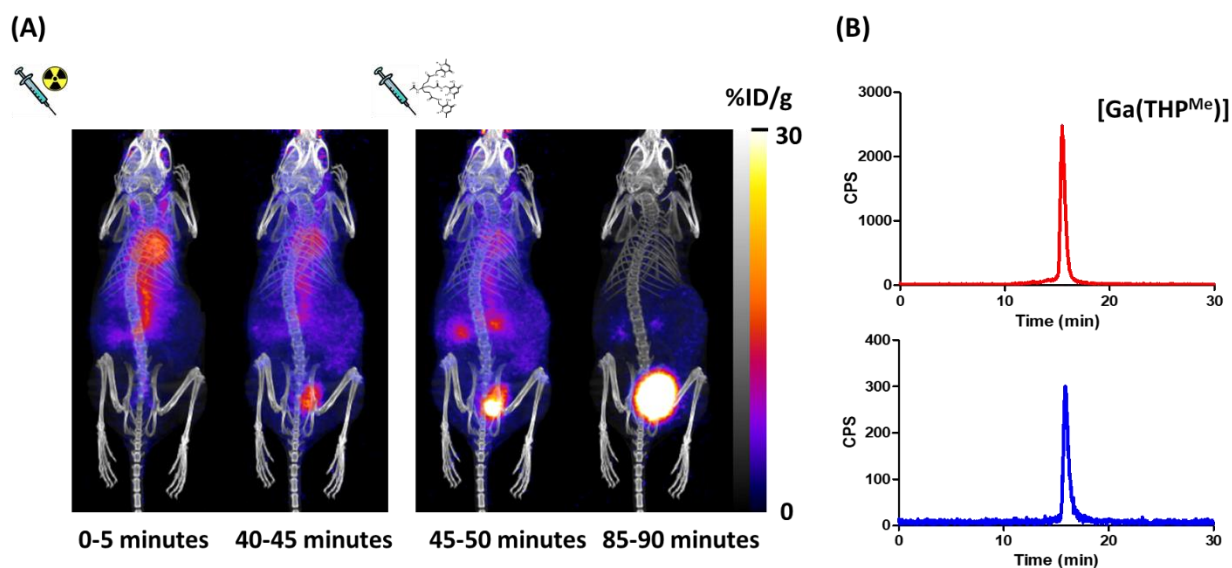

**Figure S8.** A) Dynamic PET/CT MIP, at different time points, of a mouse injected with acetate buffered  $^{68}\text{Ga}$  at time 0 followed by  $\text{THP}^{\text{Me}}$  at 45 minutes. A sudden change in the biodistribution of  $^{68}\text{Ga}$  is visible soon after injection of the chelator, with the blood pool activity quickly clearing through the kidneys into the bladder. B) Comparison of the radiochromatograms of  $[^{68}\text{Ga}(\text{THP}^{\text{Me}})]$  (top panel) and of the mouse urine at 90 minutes after  $^{68}\text{Ga}$  injection (bottom panel), demonstrating in vivo formation of  $[^{68}\text{Ga}(\text{THP}^{\text{Me}})]$  following  $\text{THP}^{\text{Me}}$  administration (reversed-phase HPLC, method 3).

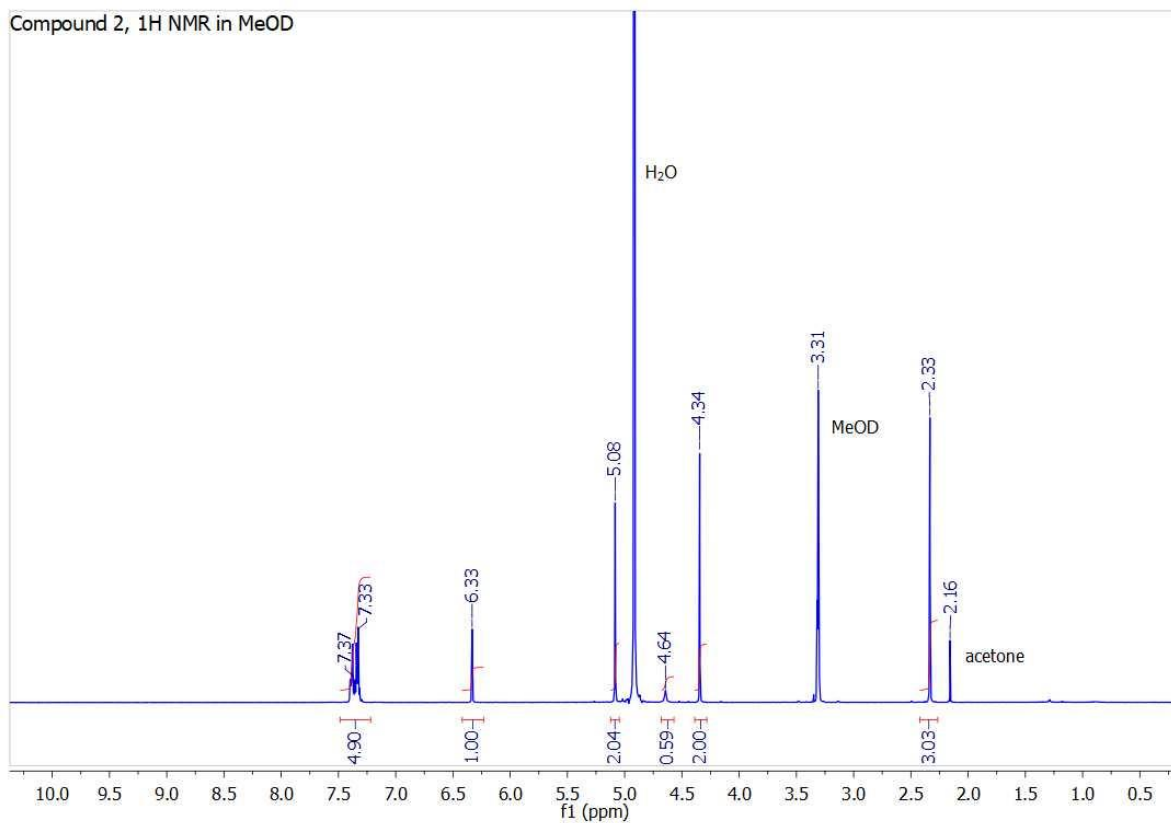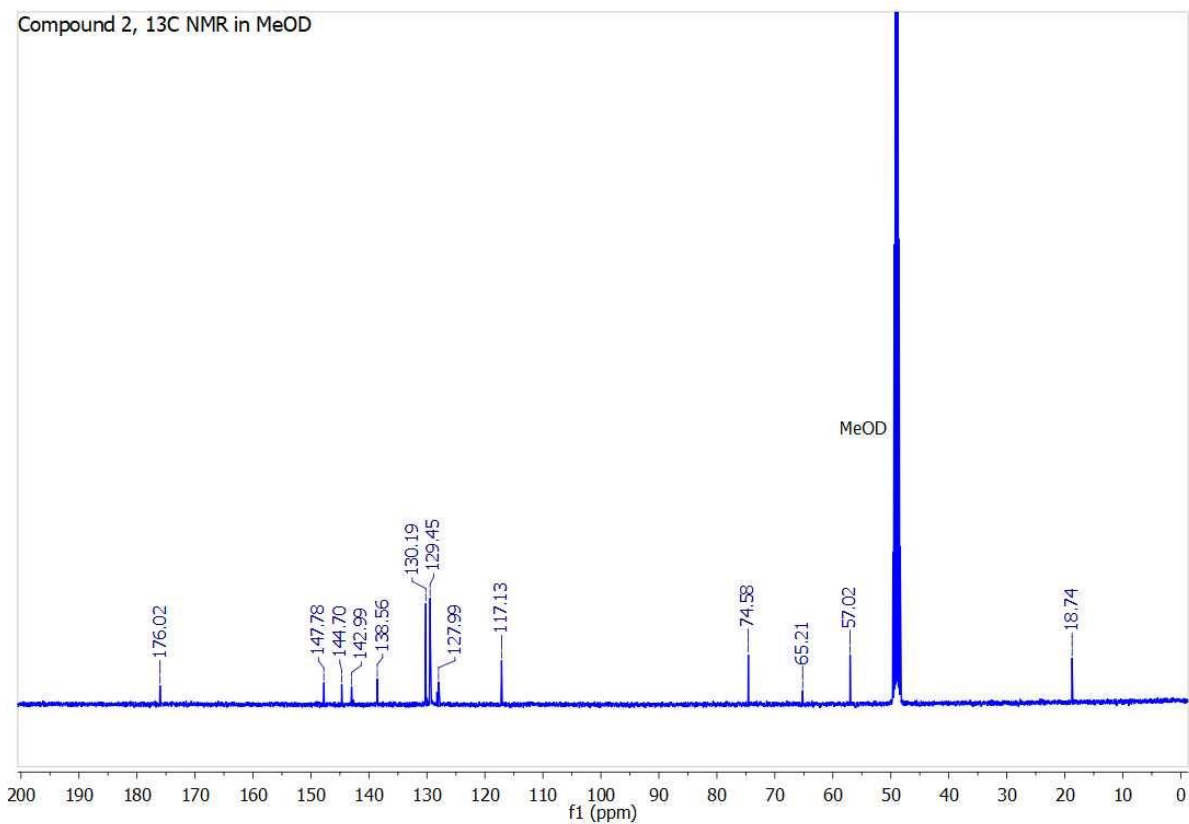

Figure S9.  $^1\text{H}$  NMR (top panel) and  $^{13}\text{C}$  NMR (bottom panel) of **2** in methanol- $d_4$ .

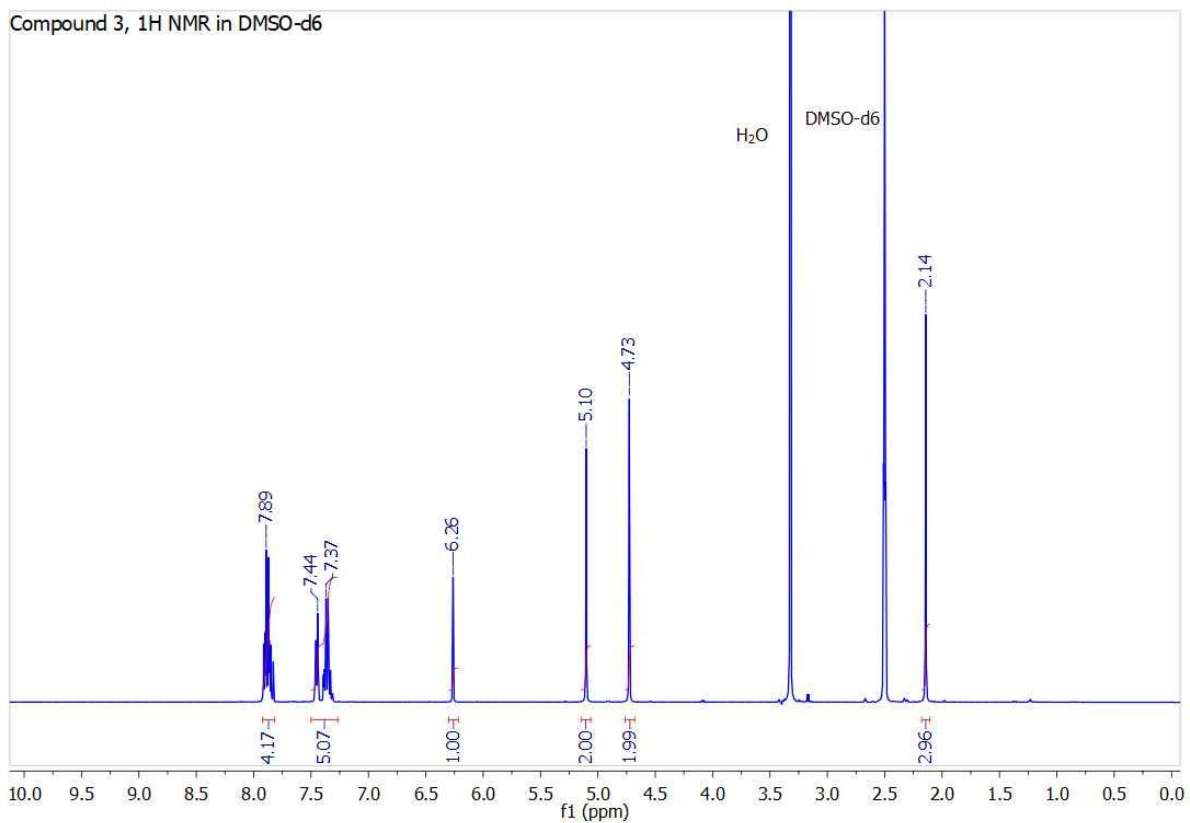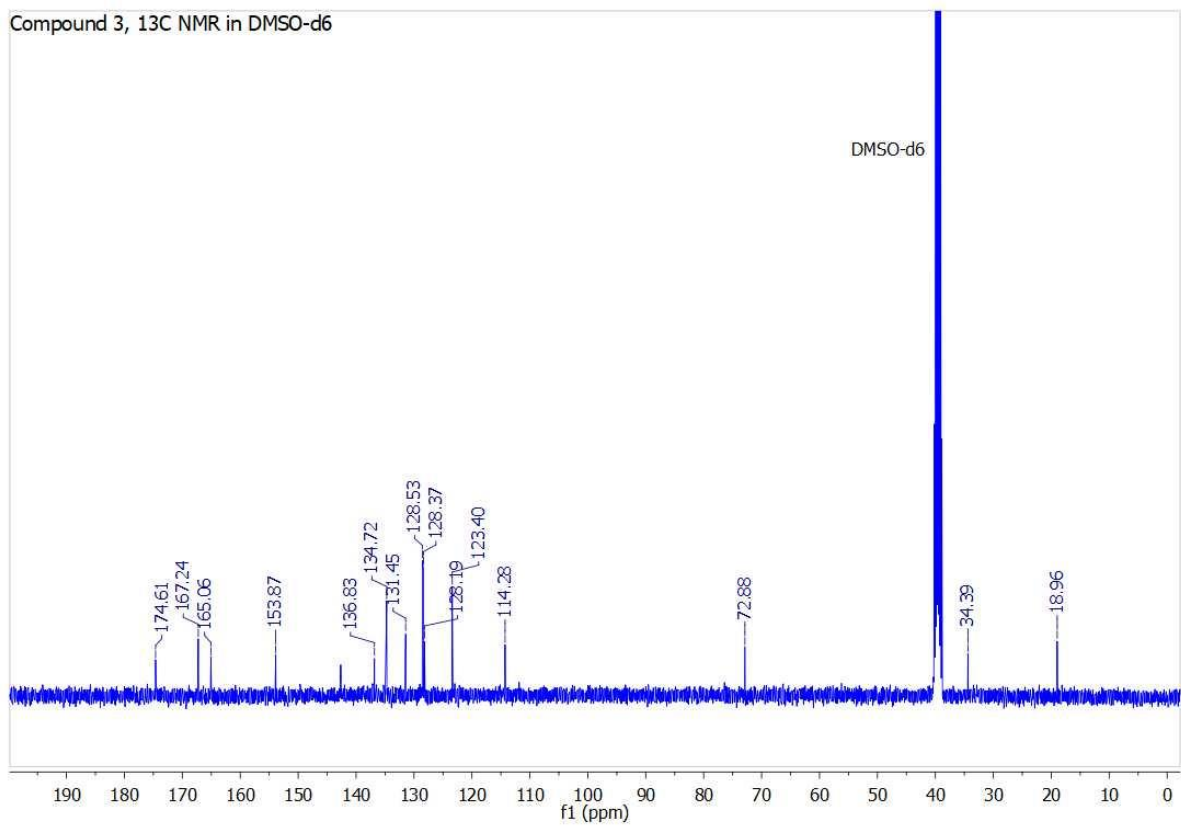

**Figure S10.**  $^1\text{H}$  NMR (top panel) and  $^{13}\text{C}$  NMR (bottom panel) of **3** in DMSO- $d_6$ .

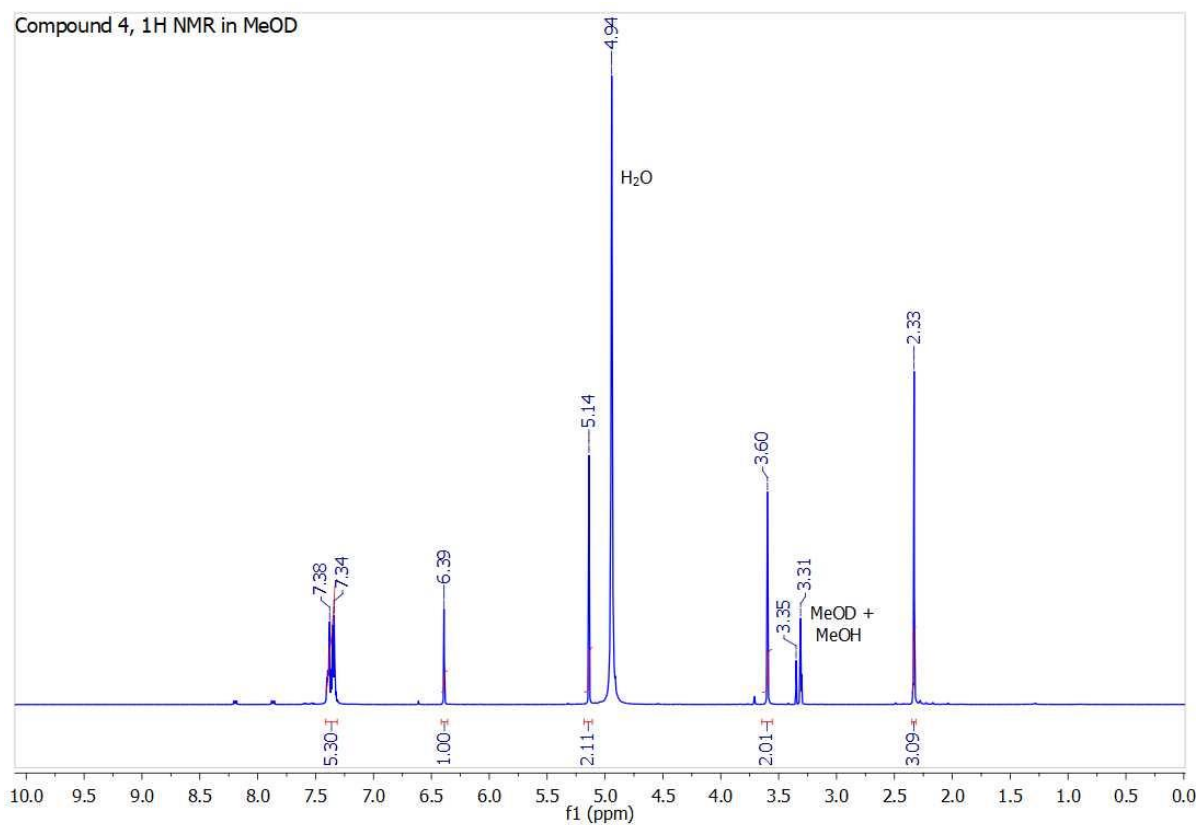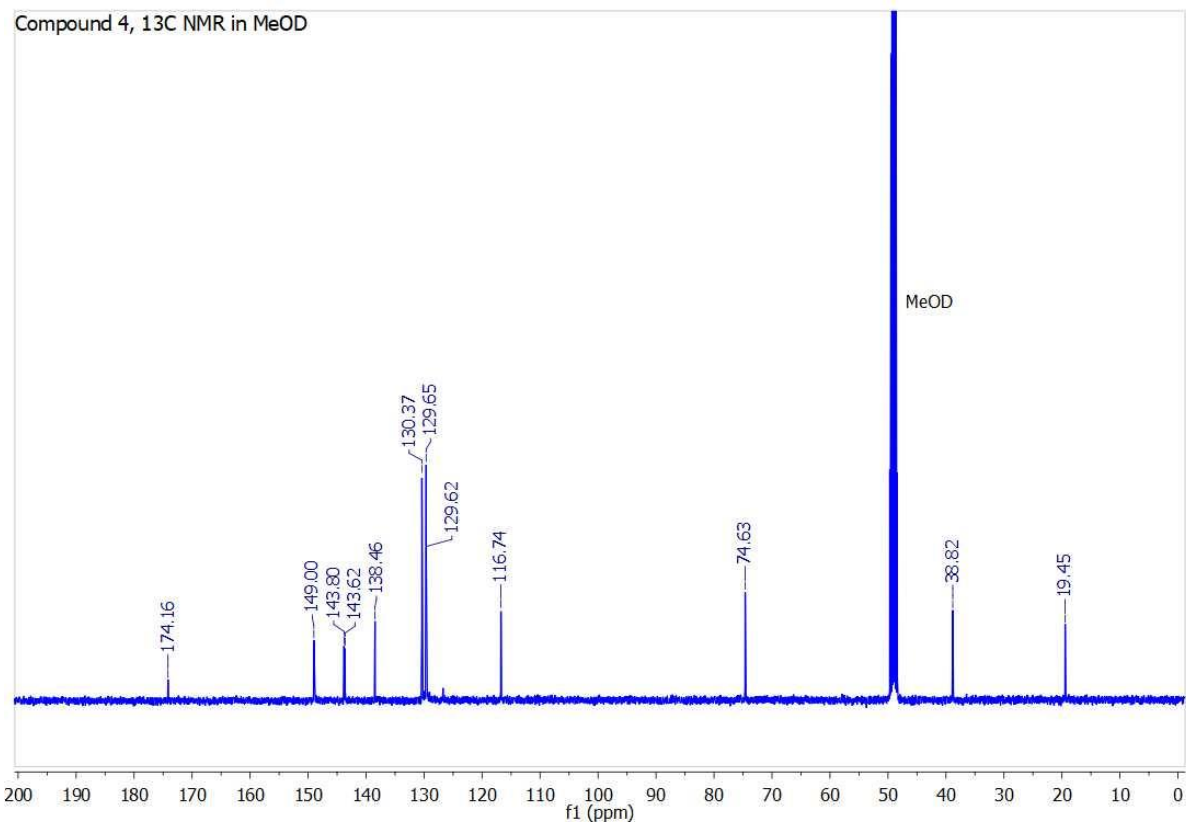

**Figure S11.**  $^1\text{H}$  NMR (top panel) and  $^{13}\text{C}$  NMR (bottom panel) of **4** in methanol- $d_4$ .

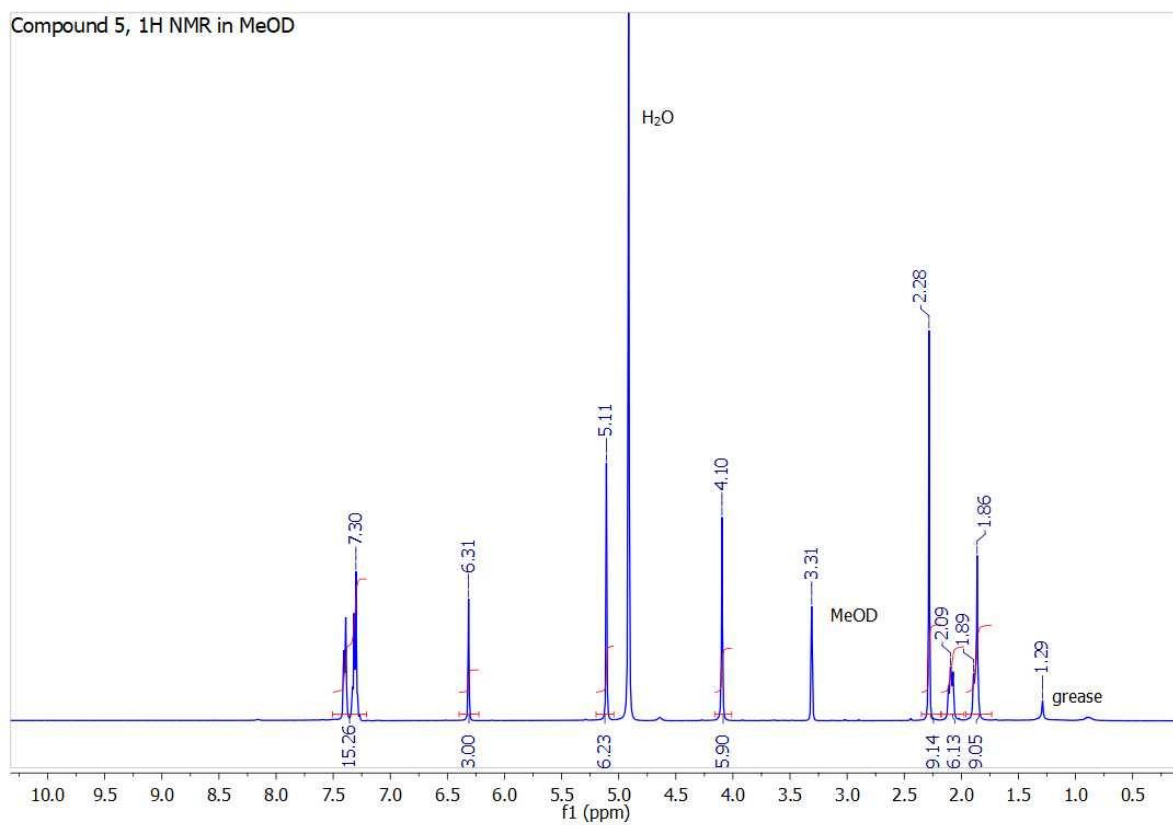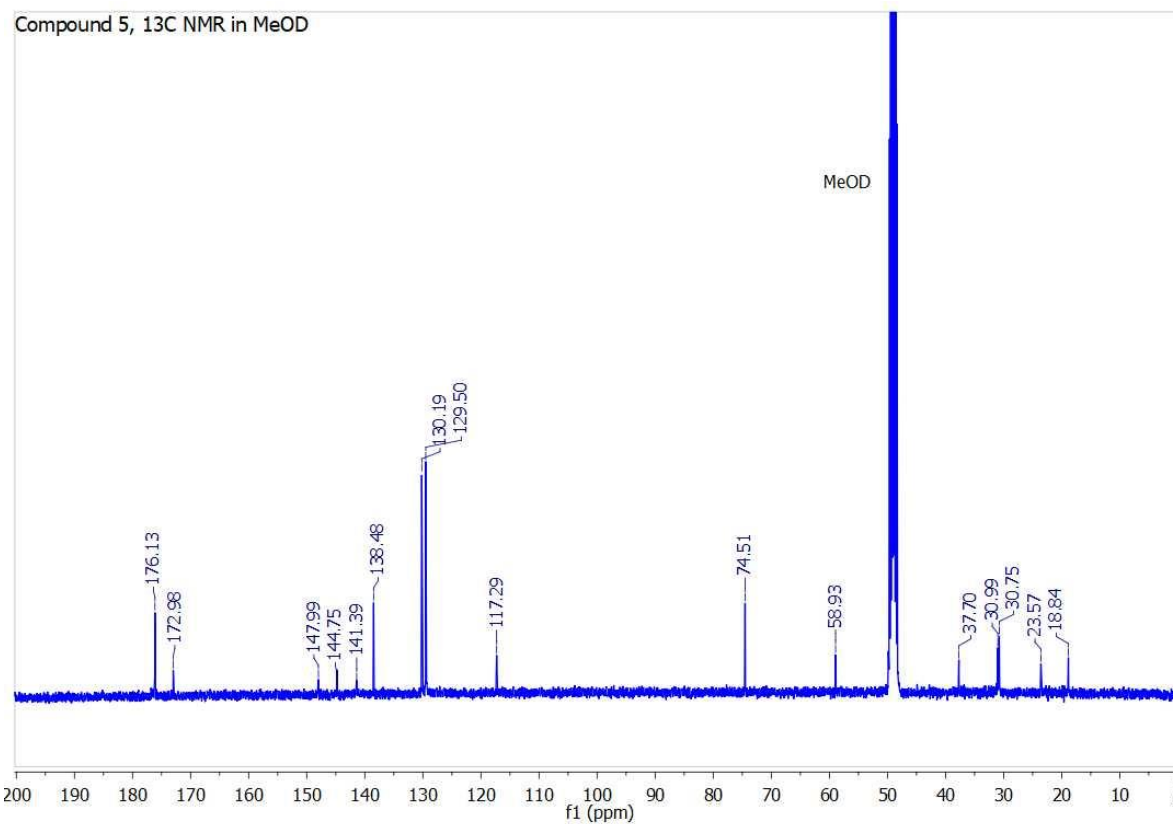

**Figure S12.**  $^1\text{H}$  NMR (top panel) and  $^{13}\text{C}$  NMR (bottom panel) of **5** in methanol- $d_4$ .



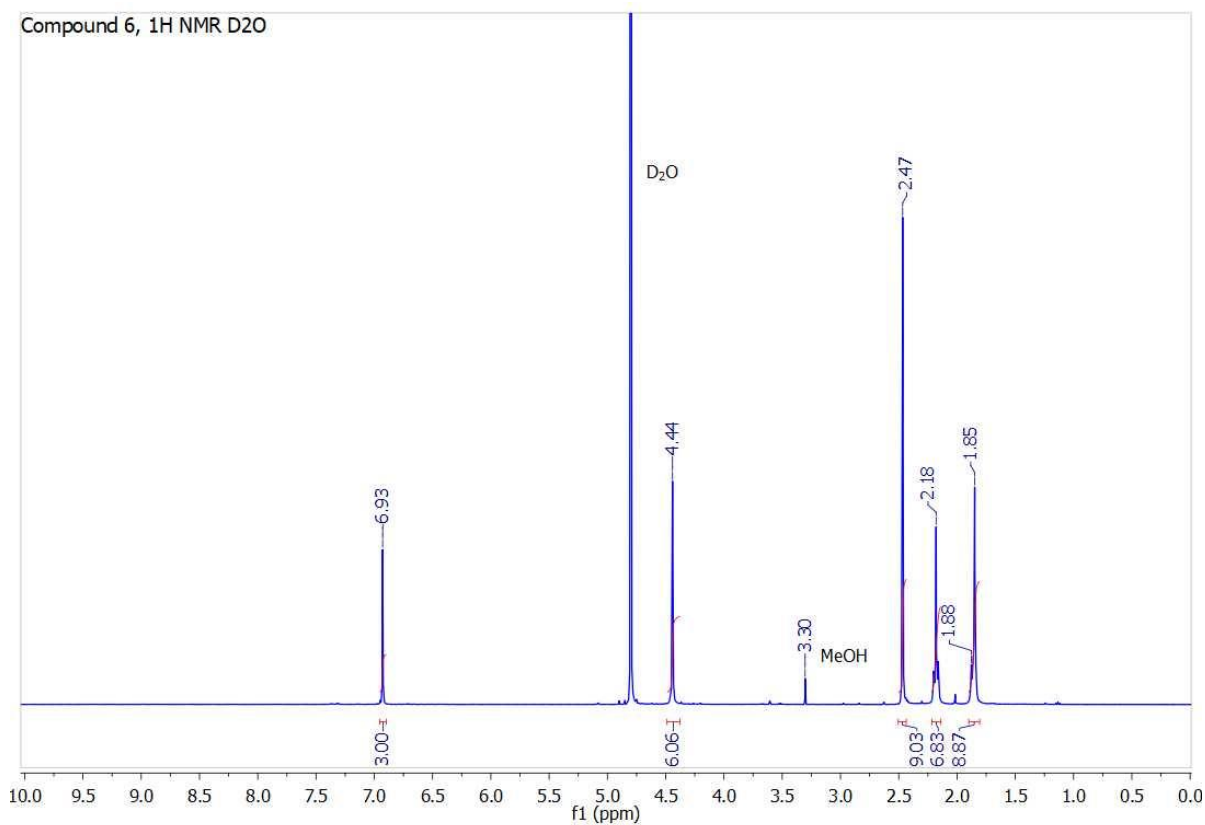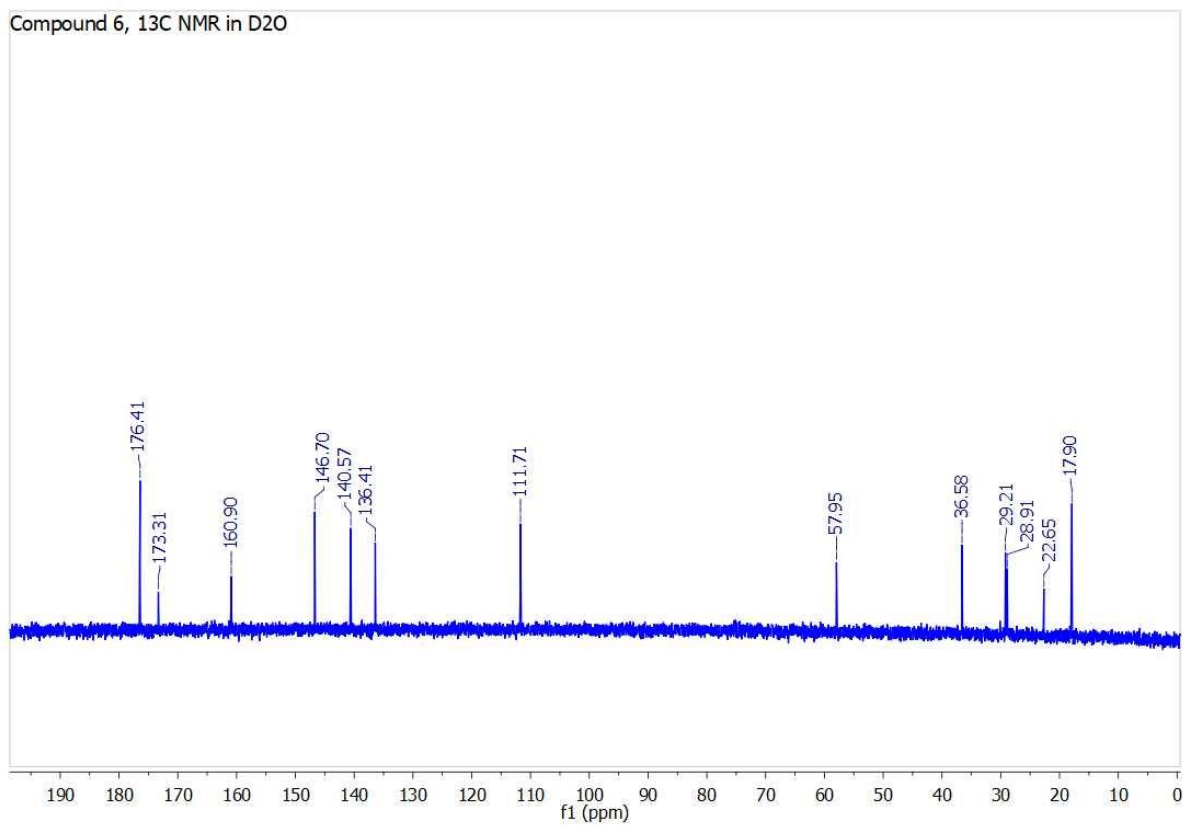

**Figure S13.**  $^1\text{H}$  NMR (top panel) and  $^{13}\text{C}$  NMR (bottom panel) of **6** in  $\text{D}_2\text{O}$ .

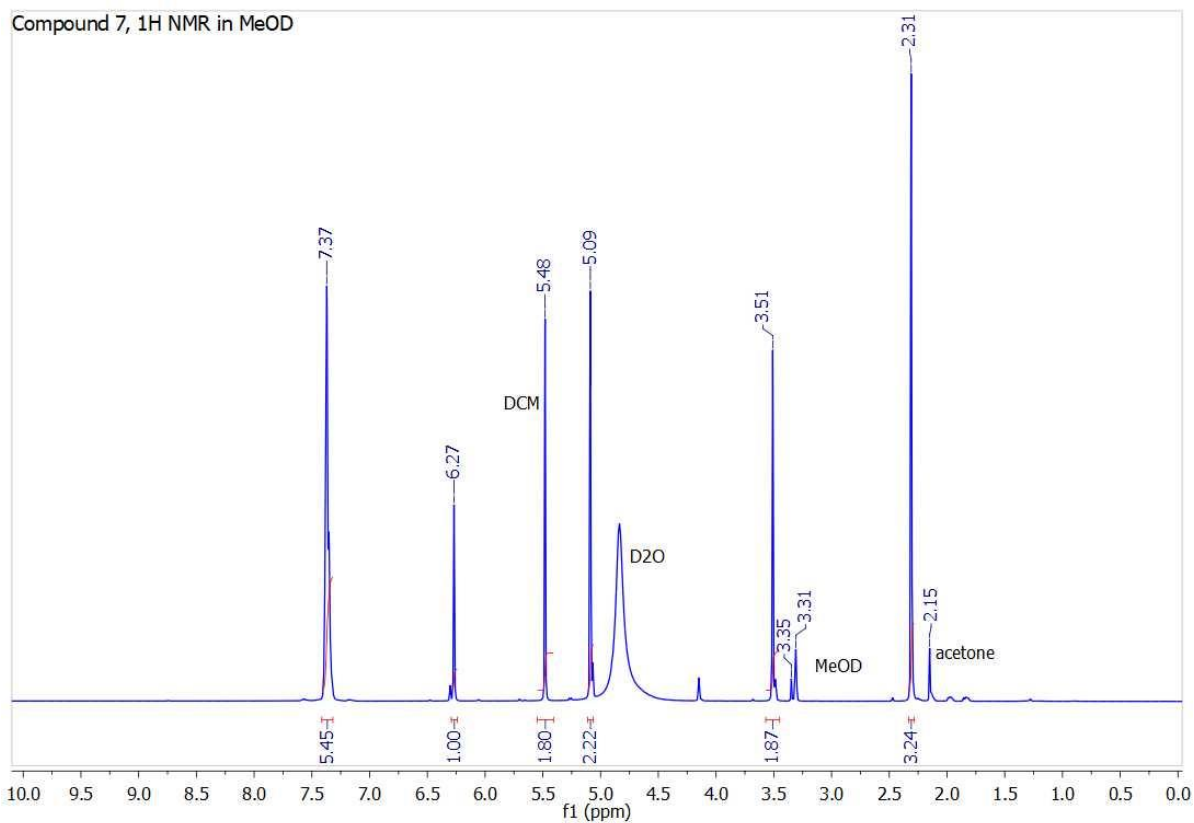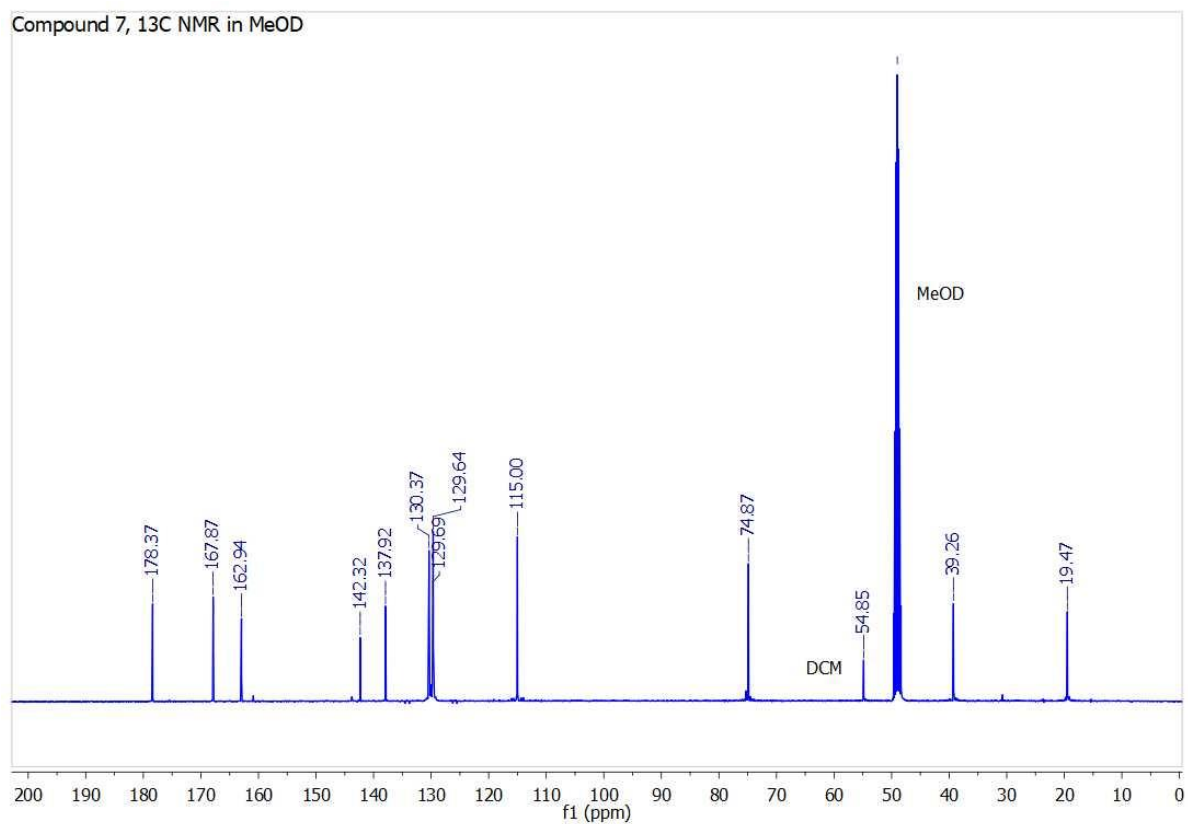

**Figure S14.**  $^1\text{H}$  NMR (top panel) and  $^{13}\text{C}$  NMR (bottom panel) of **7** in methanol- $d_4$ .

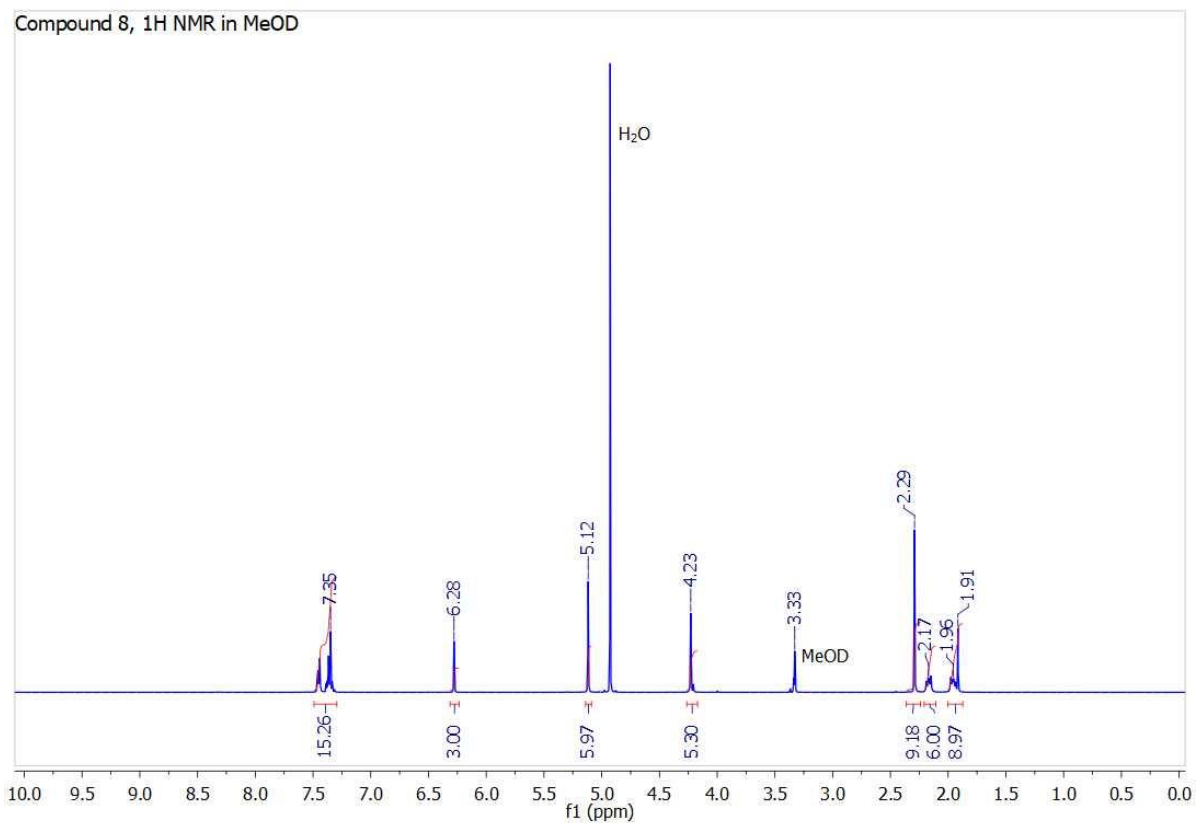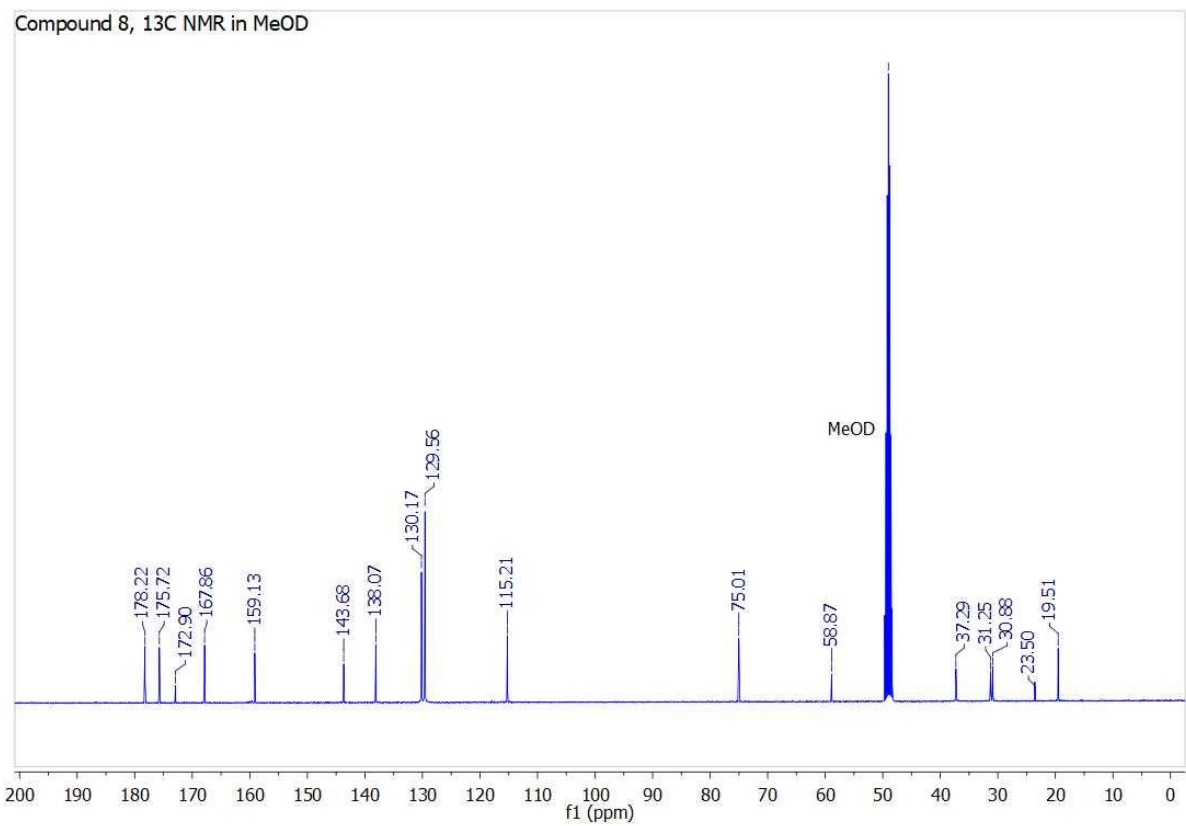

**Figure S15.**  $^1\text{H}$  NMR (top panel) and  $^{13}\text{C}$  NMR (bottom panel) of **8** in methanol- $d_4$ .

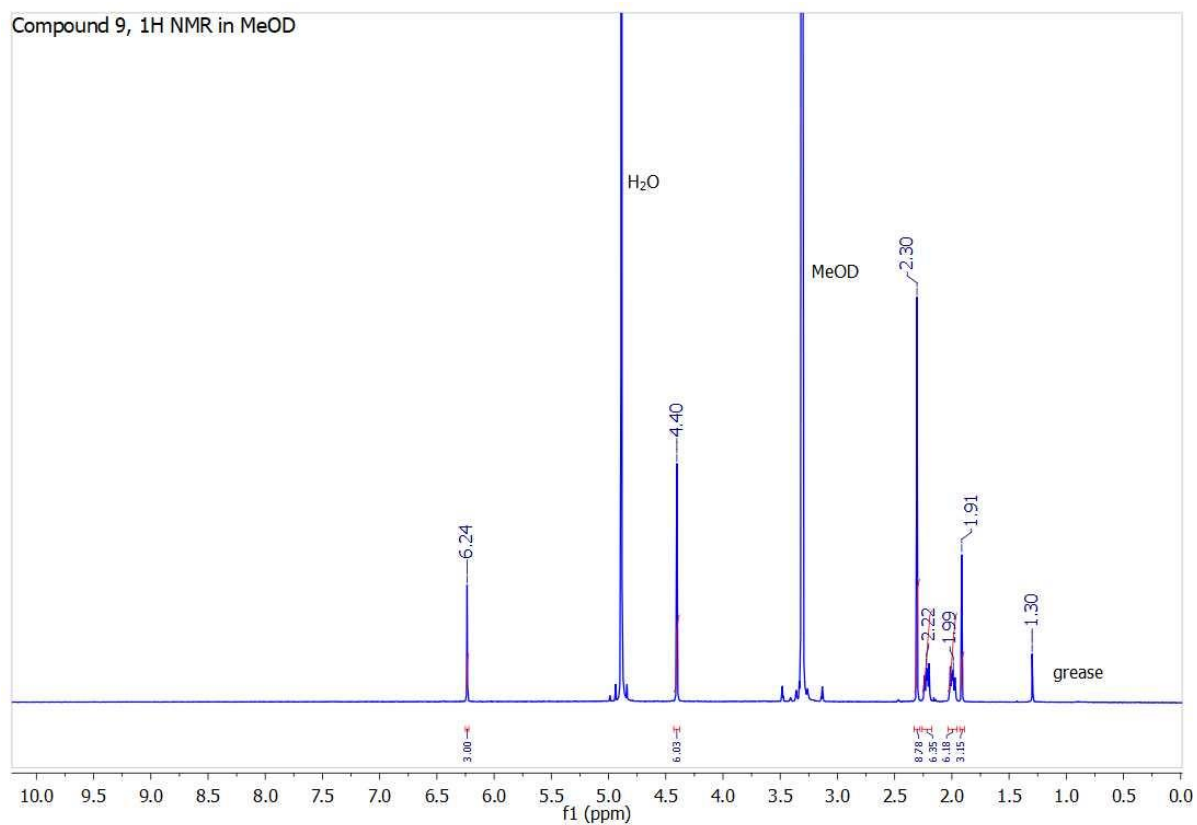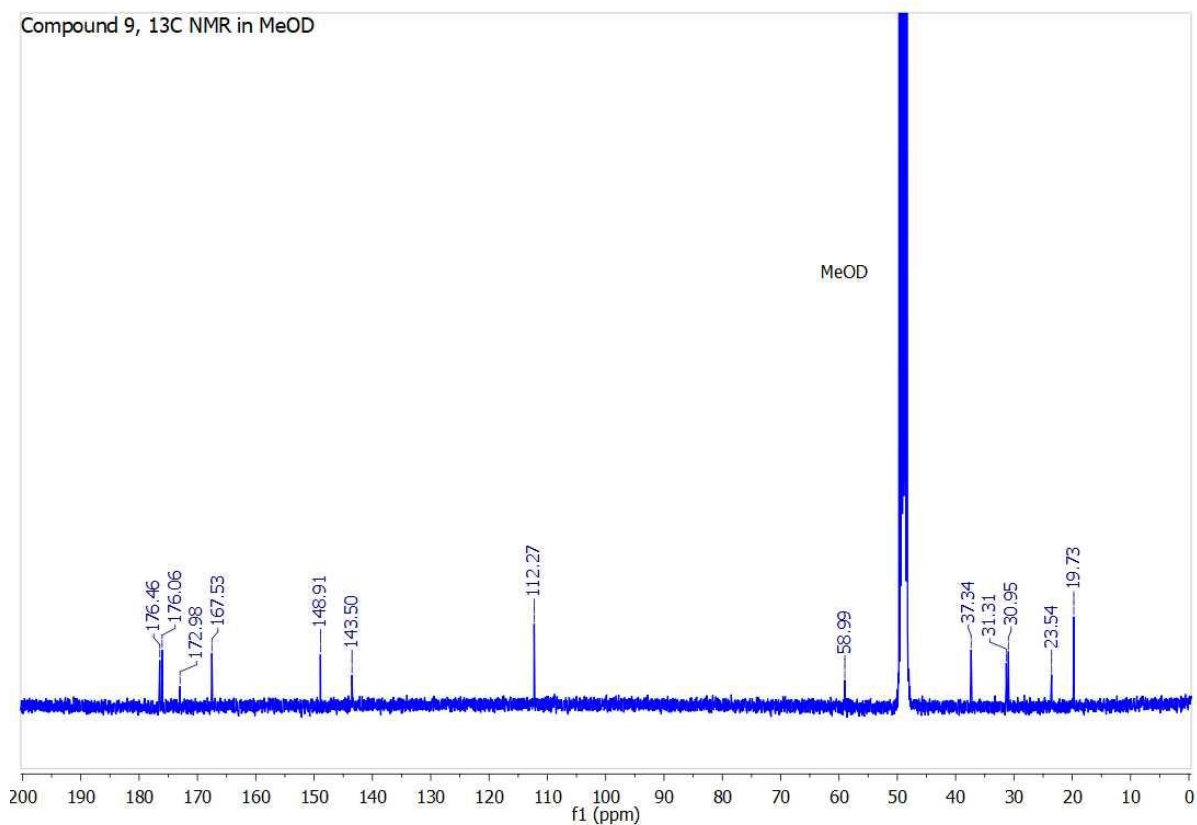

**Figure S16.**  $^1\text{H}$  NMR (top panel) and  $^{13}\text{C}$  NMR (bottom panel) of **9** in methanol- $d_4$ .

## References

1. S. Nawaz, PhD thesis, King's College London, 2013.
2. E. A. Martell and R. M. Smith, *Critical Stability Constants*, Plenum Press, New York, 1977-1989.
3. R. Cusnir, C. Imberti, P. J. Blower, M. T. Ma and R. C. Hider, *Int J Mol Sci*, 2017, 18, 116.
4. P. D. Taylor, *Talanta*, 1995, **42**, 845-850.
